# Supplementary material for: COVID-19 diagnosis by RT-qPCR in alternative specimens
Source: PubMed Central journal article supplement (PMC8370469; doi:10.1590/0074-02760210085), 2021-08-13
Supplement: 1678-8060-mioc-116-e210085-s.pdf [file 1678-8060-mioc-116-e210085-s.pdf]

TABLE I

Concordance between gingival fluid swab and nasopharyngeal swab (NP) specimens in reverse transcription real-time polymerase chain reaction (RT-qPCR)-based Coronavirus disease 2019 (COVID-19) diagnosis

| RT-qPCR result       | Gingival swab positive (agreement %) | Gingival swab inconclusive (agreement %) | Gingival swab negative (agreement %) | Total (%)  |
|----------------------|--------------------------------------|------------------------------------------|--------------------------------------|------------|
| NP swab positive     | 4 (15.38)                            | 2                                        | 20                                   | 26 (16.56) |
| NP swab inconclusive | 0                                    | 0 (0)                                    | 1                                    | 1 (0.64)   |
| NP swab negative     | 0                                    | 0                                        | 130 (100)                            | 130 (82.8) |
| Total                | 4                                    | 2                                        | 151                                  | 157        |

TABLE II

N1, N2 and reverse transcription real-time polymerase chain reaction (RT-qPCR) cycle threshold (Ct) values for gingival fluid swab and nasopharyngeal swab (NP) specimens

| Specimen      | N1 <sup>a</sup> |             | N2 <sup>b</sup> |             | RP <sup>c</sup> |             |
|---------------|-----------------|-------------|-----------------|-------------|-----------------|-------------|
|               | Mean CT (SD)    | 95% CI      | Mean Ct (SD)    | 95% CI      | Mean Ct (SD)    | 95% CI      |
| NP swab       | 24.85 ± 6.482   | 22.33-27.36 | 26.30 ± 7.147   | 23.58-29.02 | 25.45(2.097)    | 25.15-25.78 |
| Gingival swab | 36.20 ± 3.20    | 33.24-39.16 | 37.18 ± 3.032   | 35.01-39.35 | 27.36(1.924)    | 27.03-27.70 |

a: Wilcoxon matched pairs test  $p = 0.0313$ ; b: two-tailed paired T test  $p = 0.0010$ ; c: Wilcoxon matched pairs test  $p < 0.0001$ . SD: standard deviation; CI: confidence interval; RP: RNase P.

TABLE III

Concordance between saliva and nasopharyngeal swab (NP) specimens in reverse transcription real-time polymerase chain reaction (RT-qPCR)-based Coronavirus disease 2019 (COVID-19) diagnosis

| RT-qPCR result       | Saliva positive (agreement %) | Saliva inconclusive (agreement %) | Saliva negative (agreement %) | Total (%)   |
|----------------------|-------------------------------|-----------------------------------|-------------------------------|-------------|
| NP swab positive     | 48 (67.61)                    | 3                                 | 20                            | 71 (34.29)  |
| NP swab inconclusive | 1                             | 3 (42.86)                         | 3                             | 7 (3.38)    |
| NP swab negative     | 4                             | 3                                 | 122 (96.83)                   | 129 (62.32) |
| Total                | 52                            | 9                                 | 145                           | 207         |

TABLE IV

N1, N2 and reverse transcription real-time polymerase chain reaction (RT-qPCR) cycle threshold (Ct) values for gingival fluid swab and nasopharyngeal swab (NP) specimens

| Specimen | N1 <sup>*</sup> |             | N2 <sup>*</sup> |             | RP <sup>*</sup> |             |
|----------|-----------------|-------------|-----------------|-------------|-----------------|-------------|
|          | Mean CT (SD)    | 95% CI      | Mean Ct (SD)    | 95% CI      | Mean Ct (SD)    | 95% CI      |
| NP swab  | 27.34 (7.797)   | 25.58-29.09 | 27.35 (8.004)   | 25.81-29.49 | 26.68 (4.803)   | 25.01-26.35 |
| Saliva   | 30.50 (5.880)   | 29.08-31.32 | 30.67 (5.547)   | 29.26-32.08 | 22.56 (3.008)   | 22.15-22.98 |

\*\* : Wilcoxon matched pairs test  $p < 0.0001$ ; SD: standard deviation; CI: confidence interval; RP: RNase P.

## \*UFRJ-Covid19 Workgroup members

|                       |                        |
|-----------------------|------------------------|
| Aliny S Carvalho      | Juliana C de Menezes   |
| Anna CP Castiñeiras   | Juliana TS Fortuna     |
| Átila D Rossi         | Karen S Pereira        |
| Bruno Clarkson        | Karyne F Monteiro      |
| Bruno E Dematté       | Lendel C da Costa      |
| Camila A Velozo       | Kissyla HDP França     |
| Camila Nacif          | Laura Z Renault        |
| Camille Victória      | Letícia A Corrêa       |
| Leal C de Silva       | Liane J Ribeiro        |
| Carolina M Voloch     | Liliane TF Cavalcante  |
| Caroline M Nascimento | Luana S Costa          |
| Carolyne LAL da Graça | Lucas M Millioni       |
| Cíntia Policarpo      | Luciana J da Costa     |
| Cynthia C Cardoso     | Luisa M Higa           |
| Ekaterini S Goudouris | Manoel I do Nascimento |
| Elaine S da Costa     | Marcelo A de Souza     |
| Elisangela C da Silva | Marcelo CP Tôrres      |
| Fábio L Monteiro      | Marcela S Durães       |
| Fabio HC Medeiros     | Mariana F Campos       |
| Fernanda L dos Santos | Mariane T de Menezes   |
| Fernando L de Castro  | Marisa S Correia       |
| Filipe RR Moreira     | Mateus R de Queiroz    |
| Francine B Schiffler  | Matheus AC Cosentino   |
| Gabriela B Kraychete  | Mayla GM de Melo       |
| Gabriele S da Cunha   | Mirela D'arc           |
| Gisely NB da Cunha    | Pedro HC da Paz        |
| Gustavo PD da Silva   | Raquel F Coelho        |
| Harrison J Westgarth  | Richard A Maia         |
| Helena A de Oliveira  | Rodrigo M Brindeiro    |
| Helena K Toma         | Romina C Ferreira      |
| Helena T Scheid       | Sérgio M Lisboa        |
| Huang L Fang          | Thamiris S Miranda     |
| Inês C Gonçalves      | Victor A Ota           |
| Ingrid C da Silva     | Victoria C Bastos      |
| Joissy A de Oliveira  | Viviane G Gomes        |
